# Supplementary figures and images for: El xalé d'enfrente casa
Source: MDPI journal article supplement (doi:10.3390/jof7050384), 2009-01-01

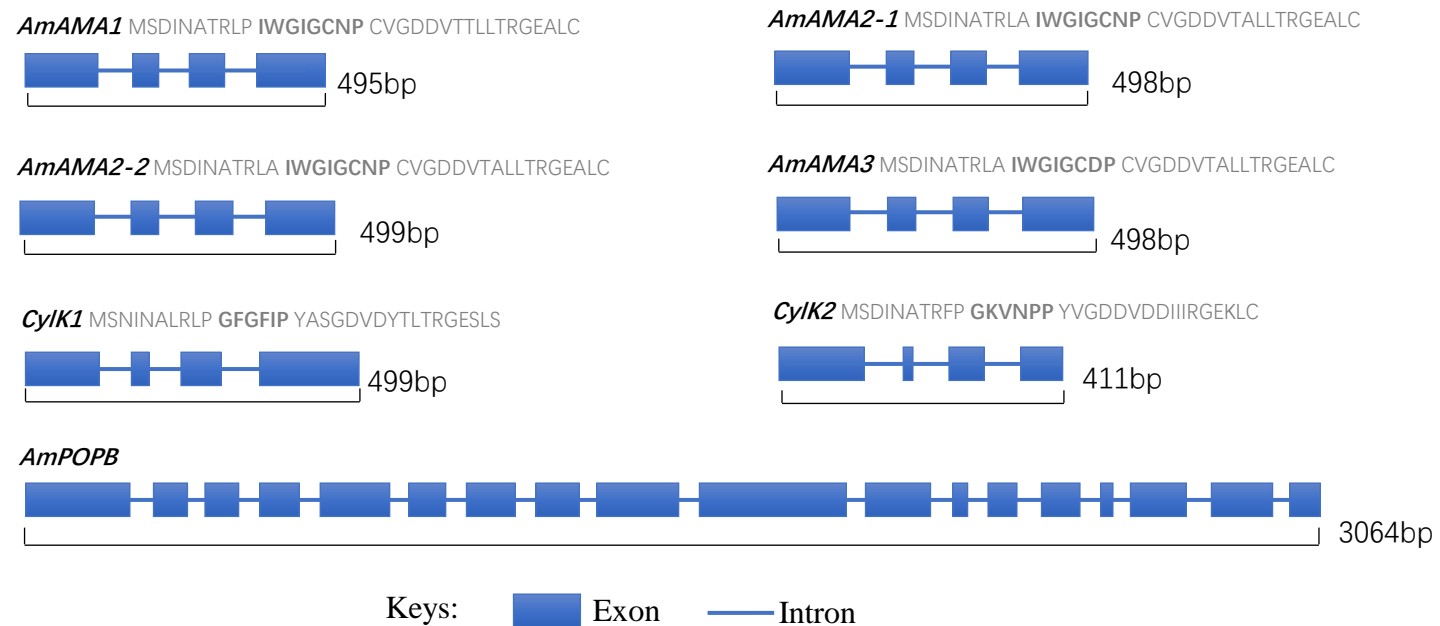

Fig. S1 Gene structure of amanitin biosynthetic genes in *Amanita molliuscula*.

Supplement: s1 [file s1]
